# Supplementary material
Source: JCI journal article supplement (doi:10.1172/jci187684)

# Full unedited blot for Figure 1

Figure 1L

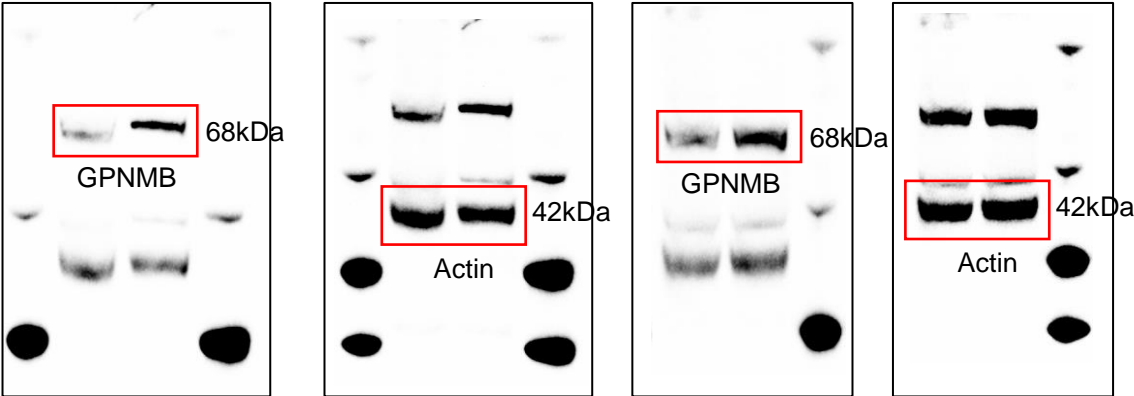

Figure 1M

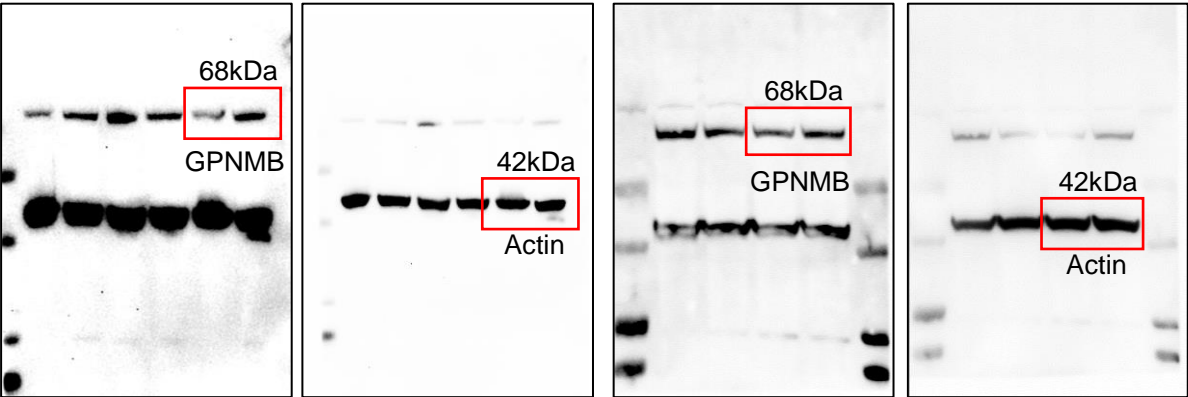

# Full unedited blot for Figure S1

## Figure S1B

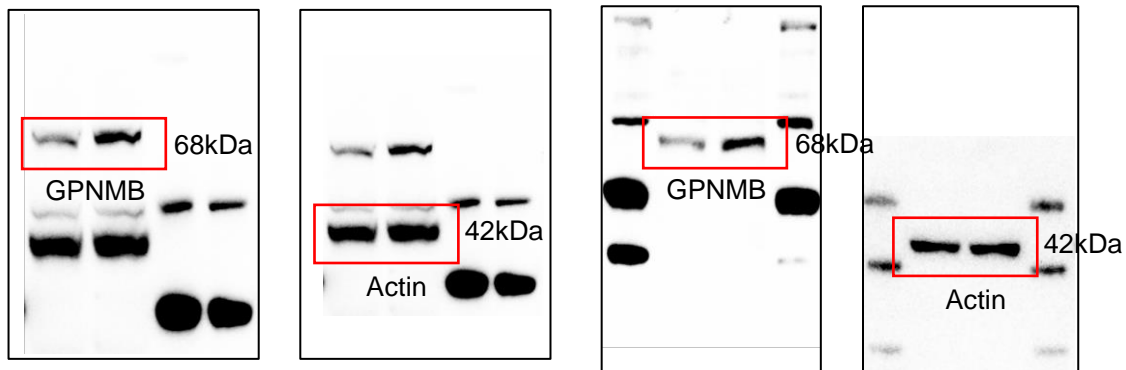

## Figure S1C

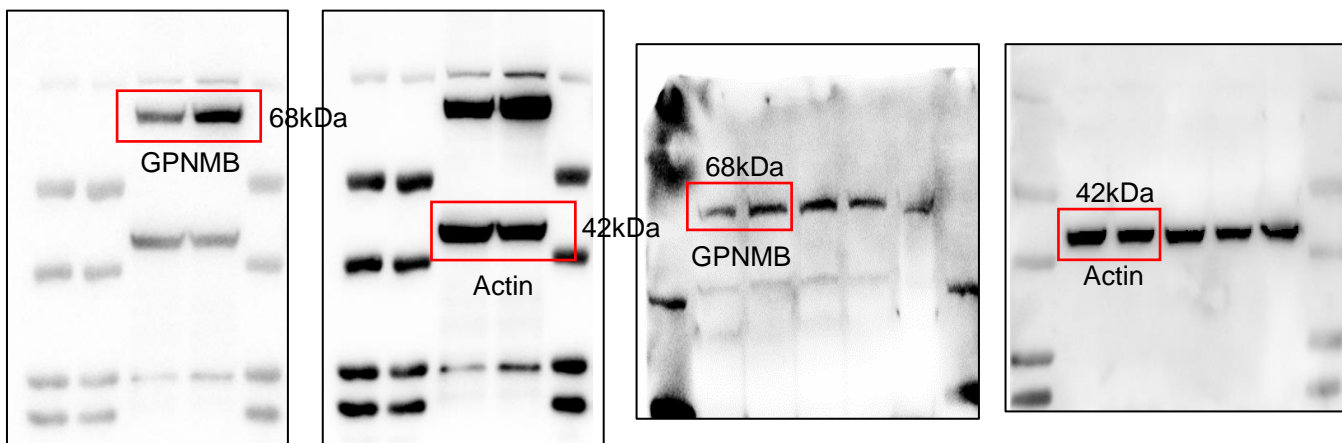

# Full unedited blot for Figure S2

## Figure S1B

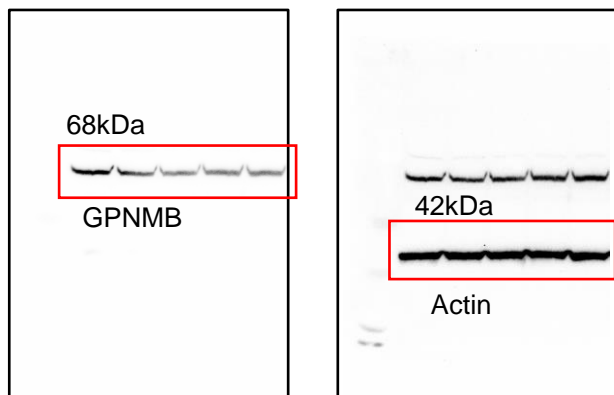

## Figure S2C

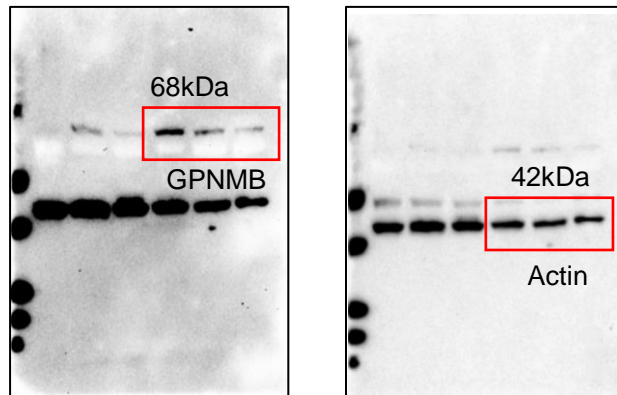

## Figure S1D

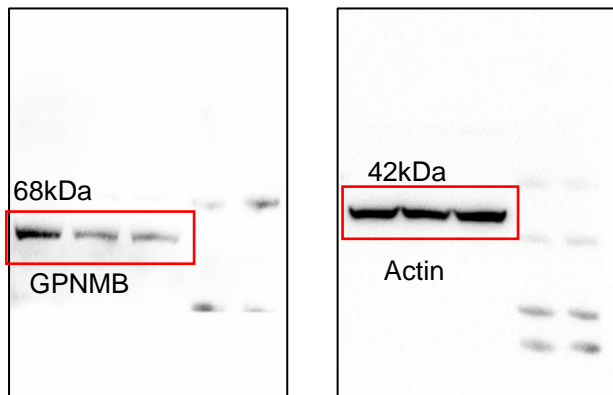

## Figure S2E

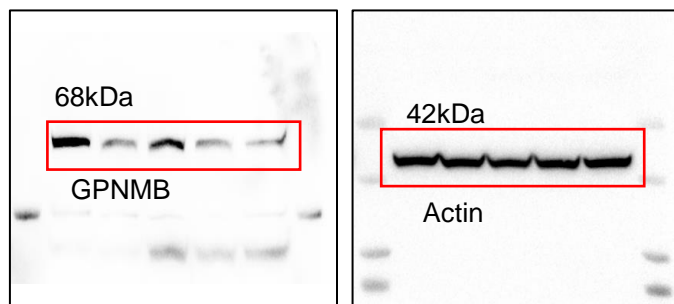

# Full unedited blot for Figure 3

### Figure 3C

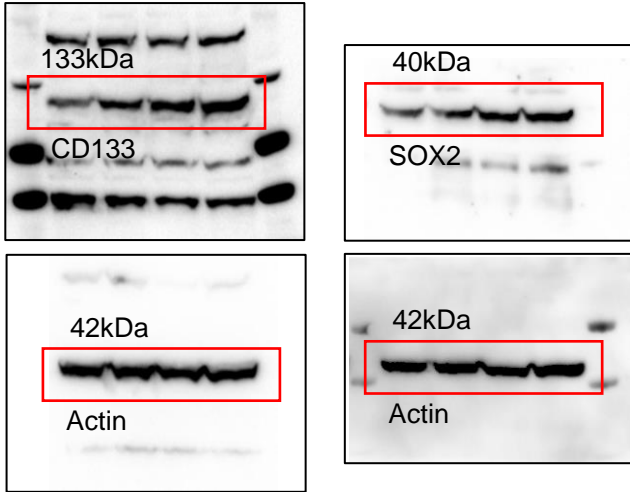

### Figure 3D

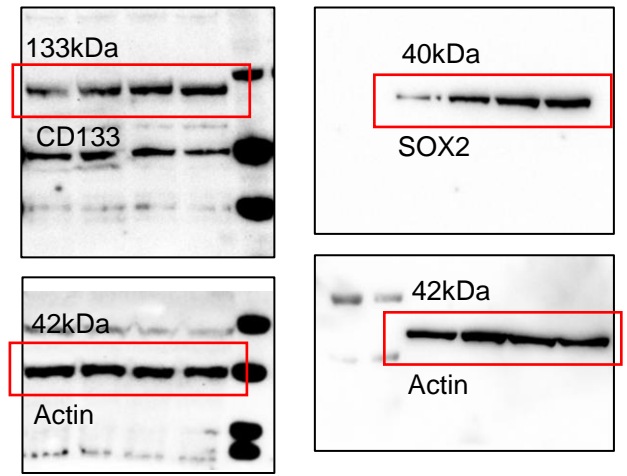

### Figure 3E

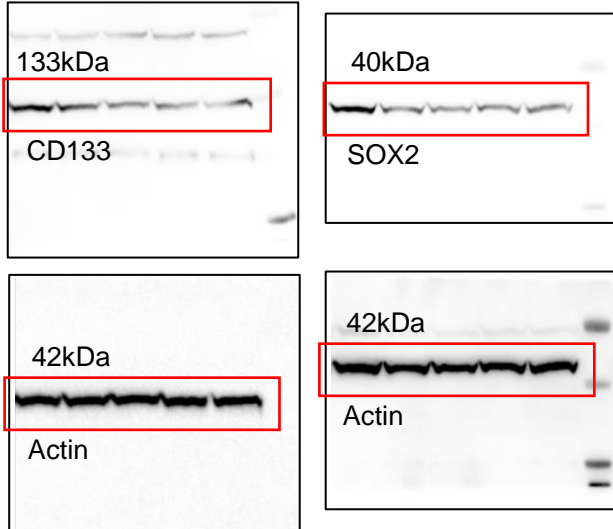

### Figure 3F

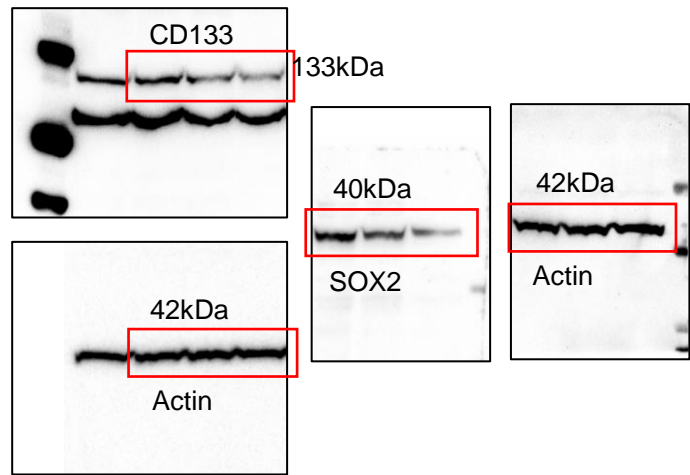

### Figure 3G

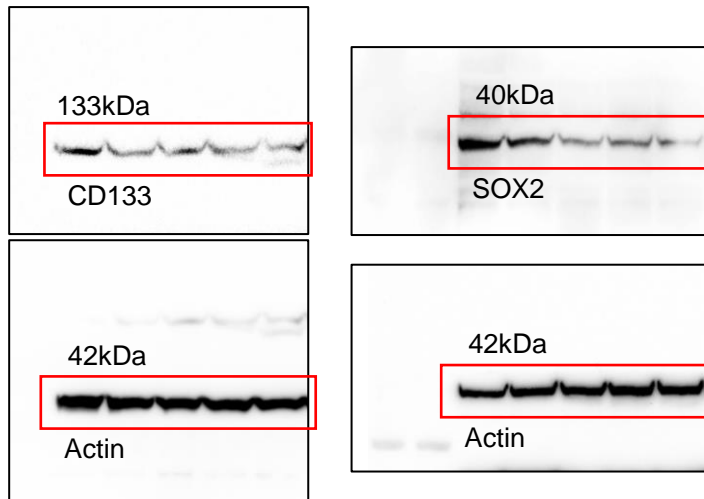

### Figure 3H

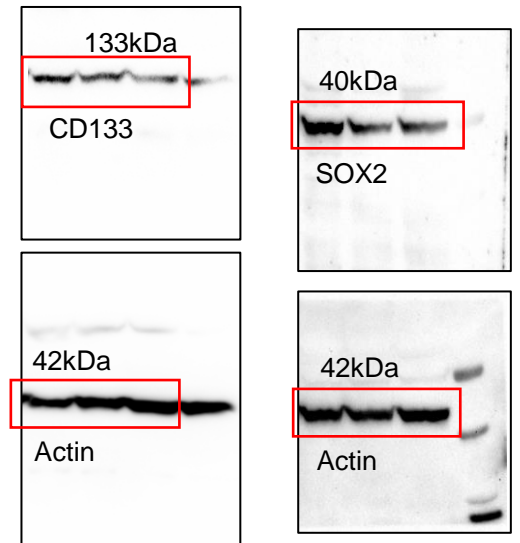

# Full unedited blot for Figure 4

## Figure 4C

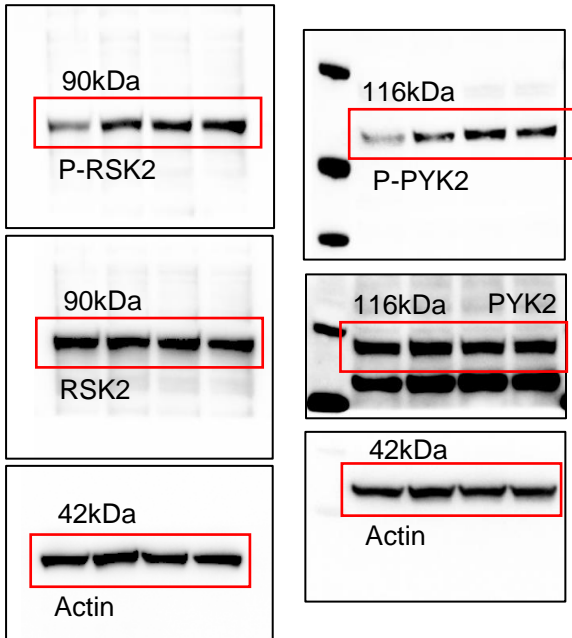

## Figure 4D

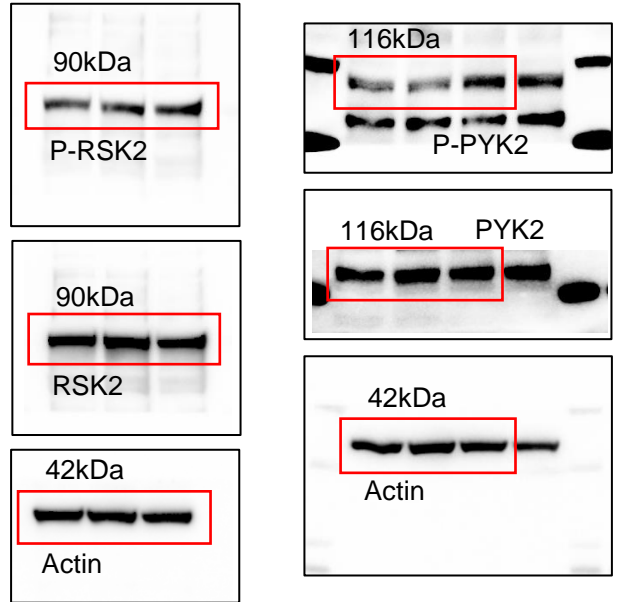

## Figure 4I

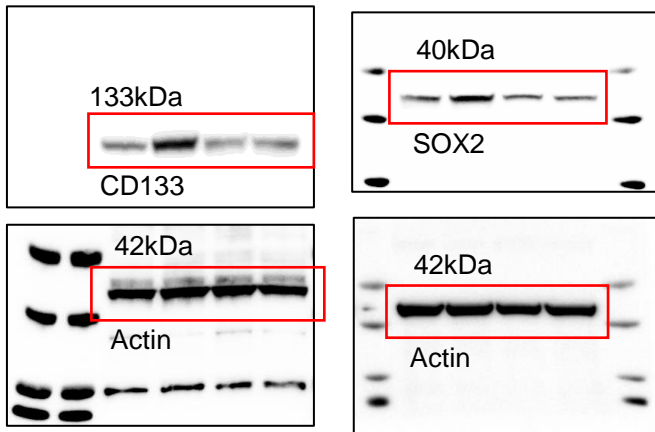

## Figure 4J

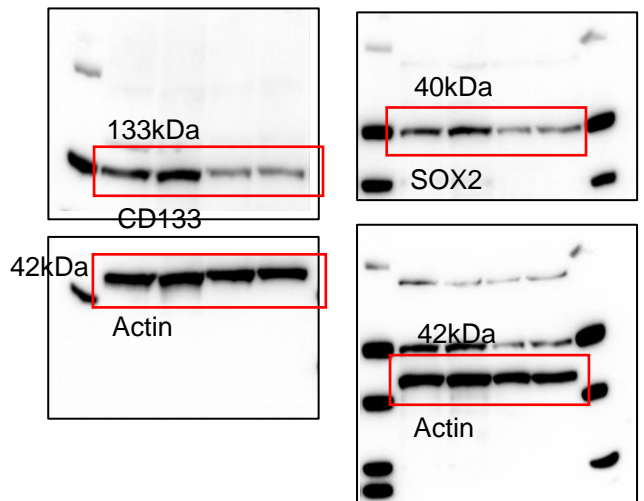

# Full unedited blot for Figure S4

### Figure S4A

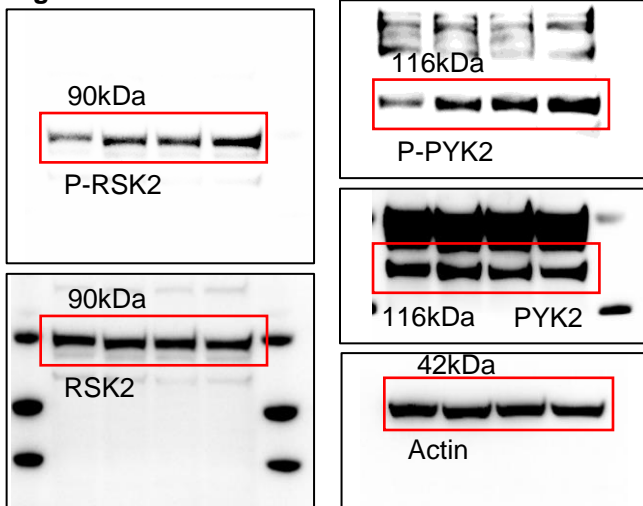

### Figure S4B

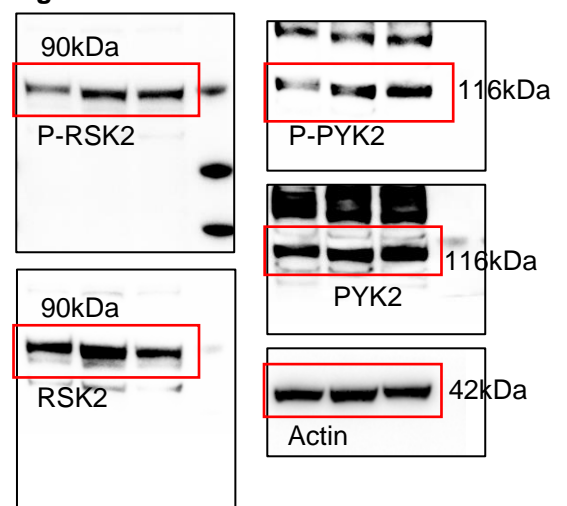

### Figure S4J

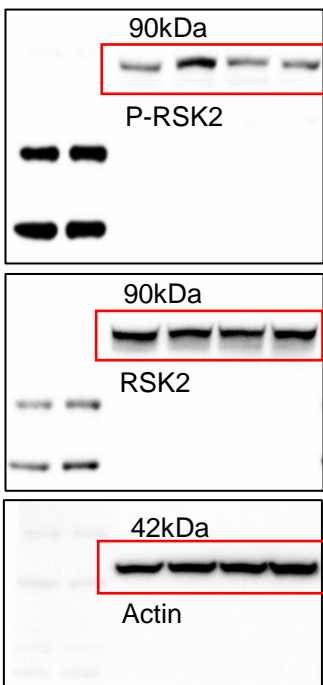

### Figure S4K

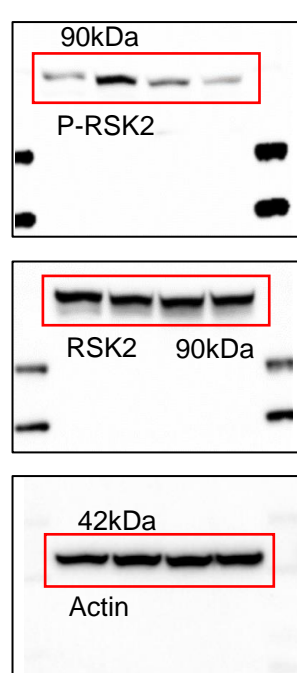

### Figure S4L

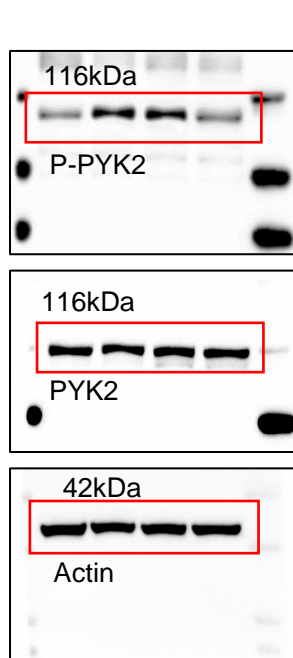

### Figure S4M

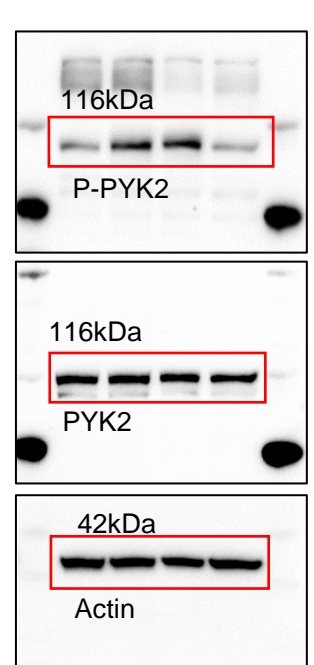

# Full unedited blot for Figure 5

Figure 5E

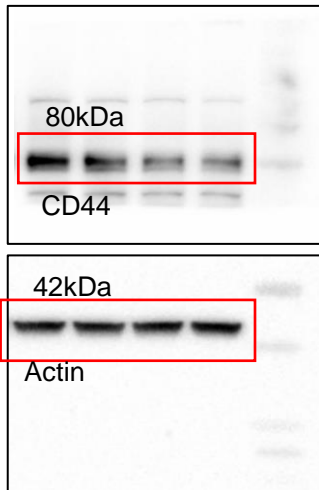

Figure 5F

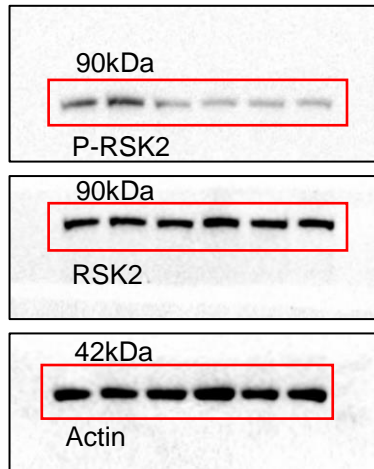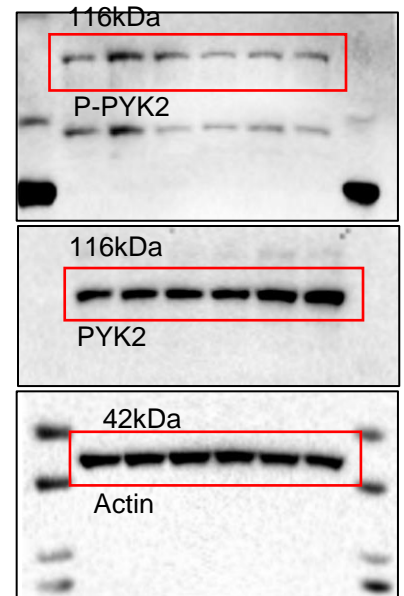

Figure 5H

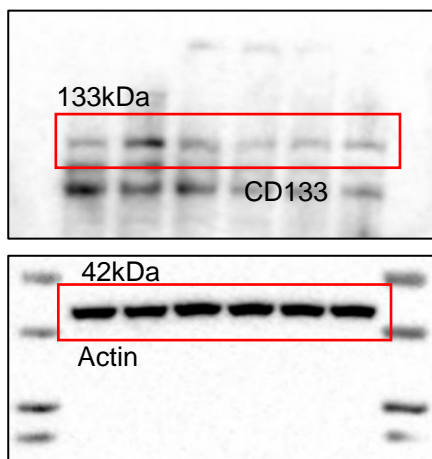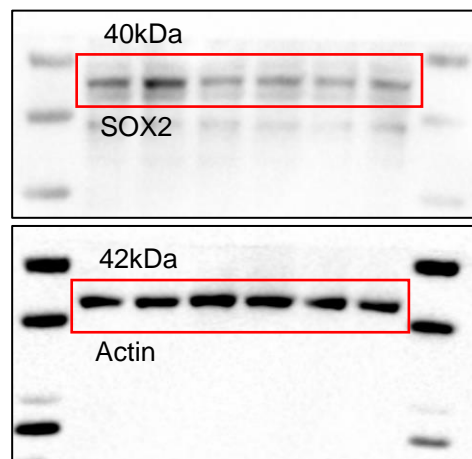

Supplement: sd2 [file 2]
