# Supplementary material
Source: JCI journal article supplement (doi:10.1172/jci187684)
Supplement: sd1 [file 1]

## Supplemental Figure 1

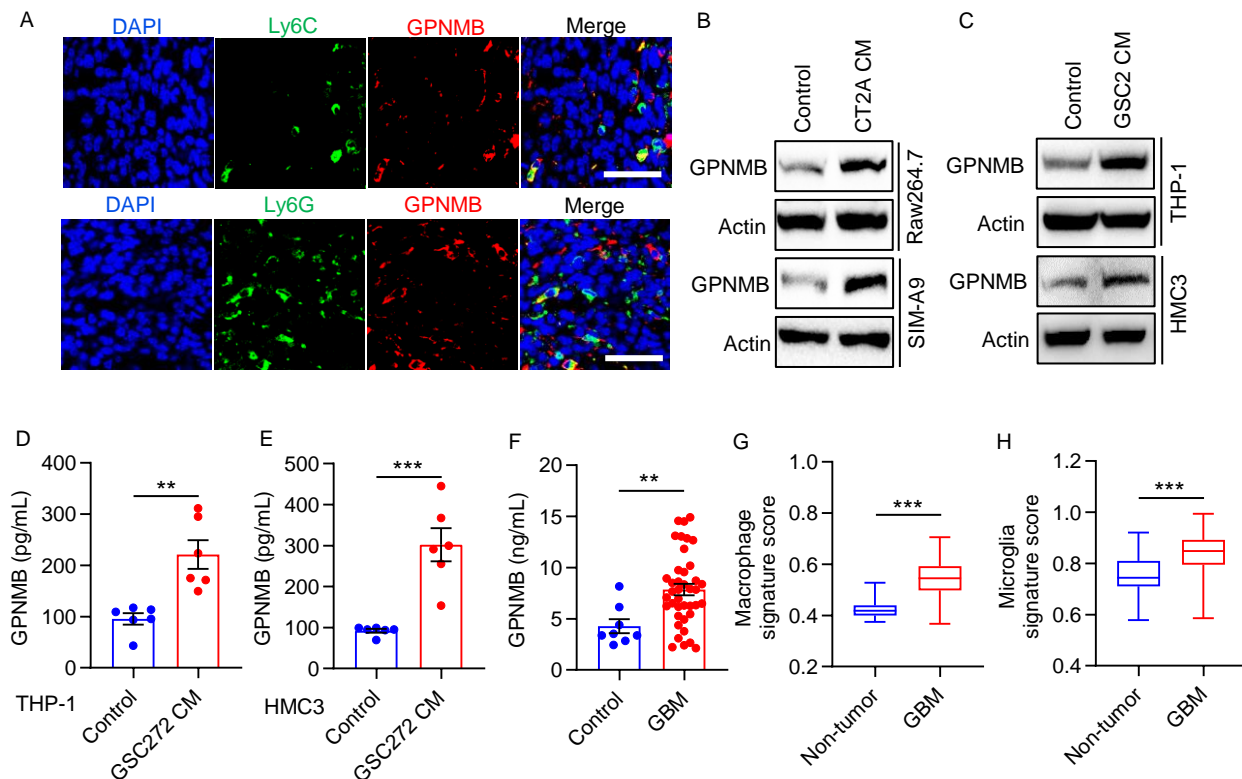

### Supplemental Figure 1. GPNMB is highly expressed in TAMs of GBM

**(A)** Co-immunofluorescence staining for GPNMB (red) and Ly6C (monocytic immature myeloid cell marker, green) or Ly6G (polymorphonuclear immature myeloid cell marker, green) in CT2A tumors implanted in C57BL/6 mice. Scale bar, 50  $\mu$ m. **(B)** Immunoblots for GPNMB in lysates of Raw264.7 macrophages and SIM-A9 microglia treated with the conditioned media (CM) of CT2A cells for 24 hours. **(C)** Immunoblots for GPNMB in lysates of THP-1 macrophages and HMC3 microglia treated with GSC2 CM for 24 hours. **(D and E)** ELISA for GPNMB in the CM of THP-1 macrophages (D) and HMC3 microglia (E) treated with GSC272 CM for 24 hours.  $n = 6$  independent samples. Student's  $t$  test. **(F)** ELISA for GPNMB in the plasma from healthy controls ( $n = 8$ ) and patients with GBM ( $n = 40$ ). Student's  $t$  test. **(G and H)** Macrophage (G) or microglia (H) signature scores in healthy controls ( $n = 28$ ) and patients with GBM ( $n = 219$ ) from Rembrandt dataset. Student's  $t$  test. \*\*,  $P < 0.01$ , \*\*\*,  $P < 0.001$ .

**Supplemental Figure 2**

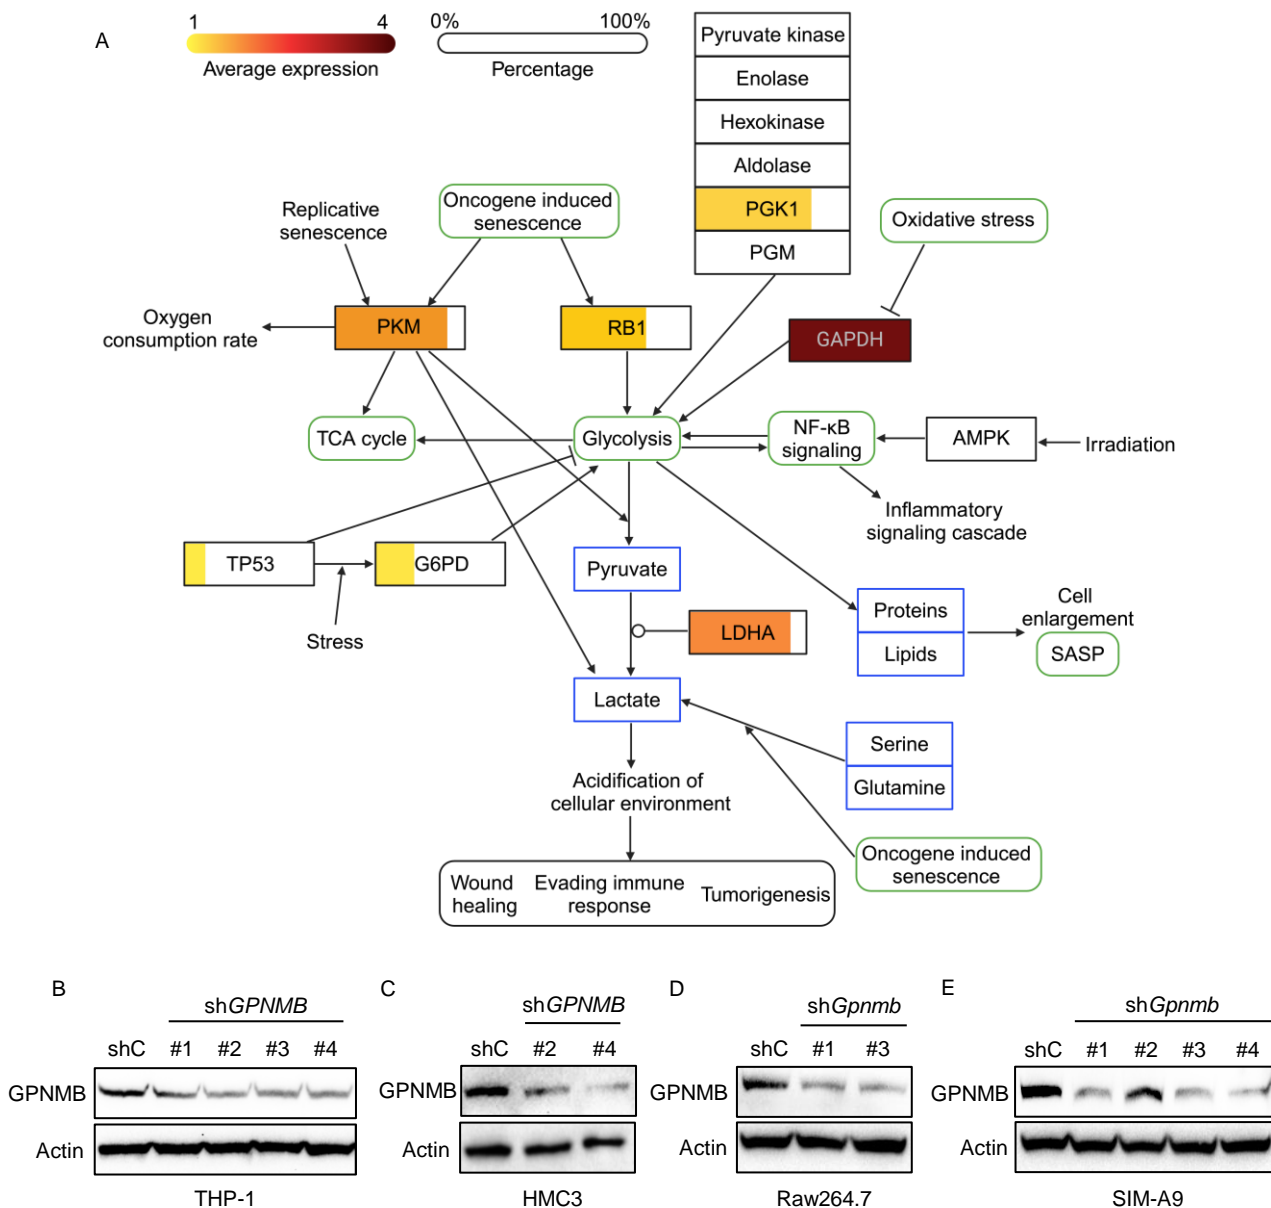

**Supplemental Figure 2. The glycolysis of GSCs is facilitated by GPNMB**

**(A)** Correlated pathway interaction network of glycolysis with the expression levels of key genes in GBM tumors with *GPNMB*-high compared with *GPNMB*-low in macrophages based on single-cell RNA sequencing dataset (EGAS00001004871). **(B and C)** Immunoblots for GPNMB in lysates of THP-1 macrophages (B) and HMC3 microglia (C) expressing shRNA control (shC) or *GPNMB* shRNA (sh*GPNMB*). **(D and E)** Immunoblots for GPNMB in lysates of Raw264.7 macrophages (D) and SIM-A9 microglia (E) expressing shC and sh*Gpnmb*.

### Supplemental Figure 3

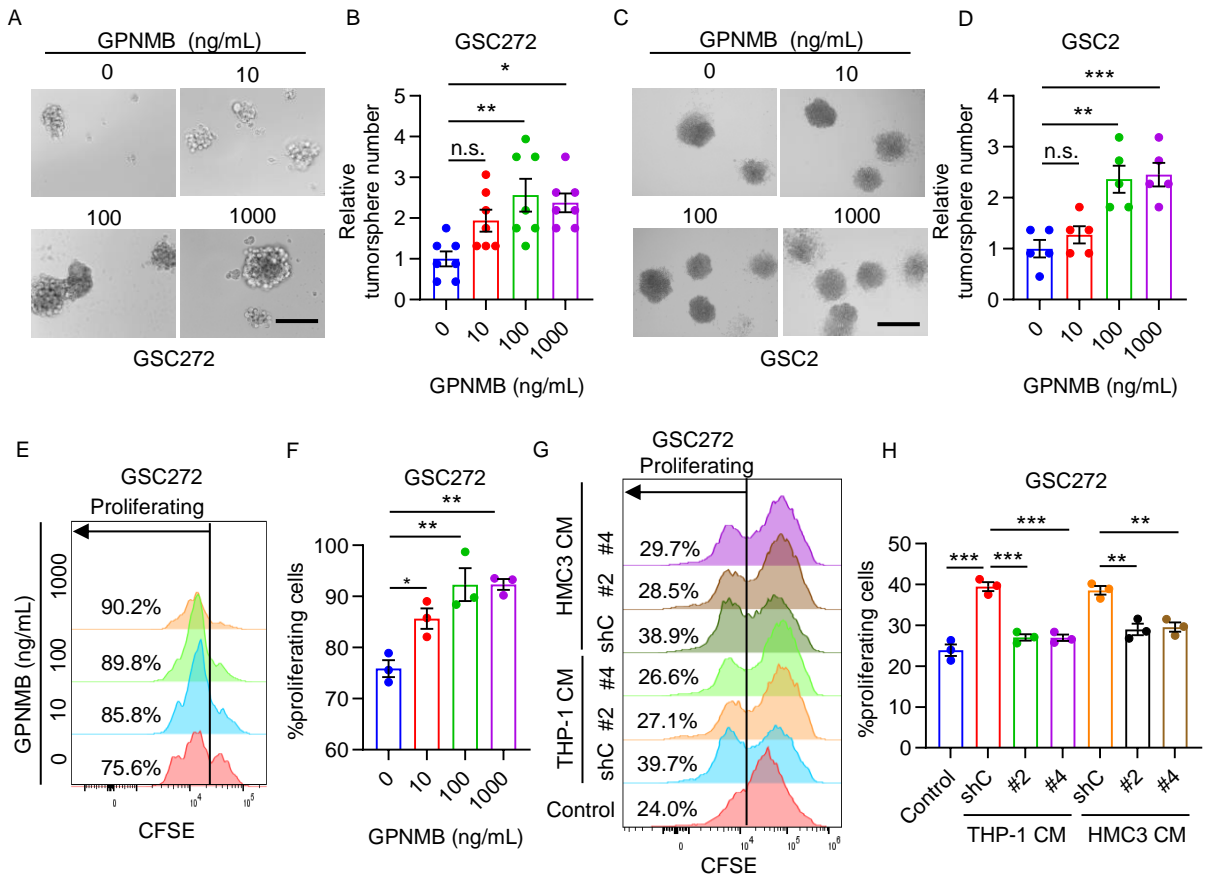

### Supplemental Figure 3. GPNMB increased the GSC self-renewal

**(A and B)** Representative images (A) and quantification (B) of tumorspheres of GSC272 treated by GPNMB recombinant protein in different indicated concentrations for 2 weeks. Scale bar, 200  $\mu$ m.  $n = 7$  independent samples. One-way ANOVA test. **(C and D)** Representative images (C) and quantification (D) of tumorspheres of GSC2 treated by GPNMB recombinant protein in different indicated concentrations for 2 weeks. Scale bar, 200  $\mu$ m.  $n = 5$  independent samples. One-way ANOVA test. **(E and F)** Representative images (E) and quantification (F) of proliferation of GSC272 treated by GPNMB recombinant protein in different indicated concentration for 5 days.  $n = 3$  independent samples. One-way ANOVA test. **(G and H)** Representative images (G) and quantification (H) of proliferation of GSC272 treated by the conditioned media (CM) of THP-1 macrophages or HMC3 microglia expressing shRNA control (shC) or *GPNMB* shRNA (sh*GPNMB*) for 3 days.  $n = 3$  independent samples. One-way ANOVA test. \*,  $P < 0.05$ , \*\*,  $P < 0.01$ , \*\*\*,  $P < 0.001$ , n.s., not significant ( $P > 0.05$ ).

**Supplemental Figure 4**

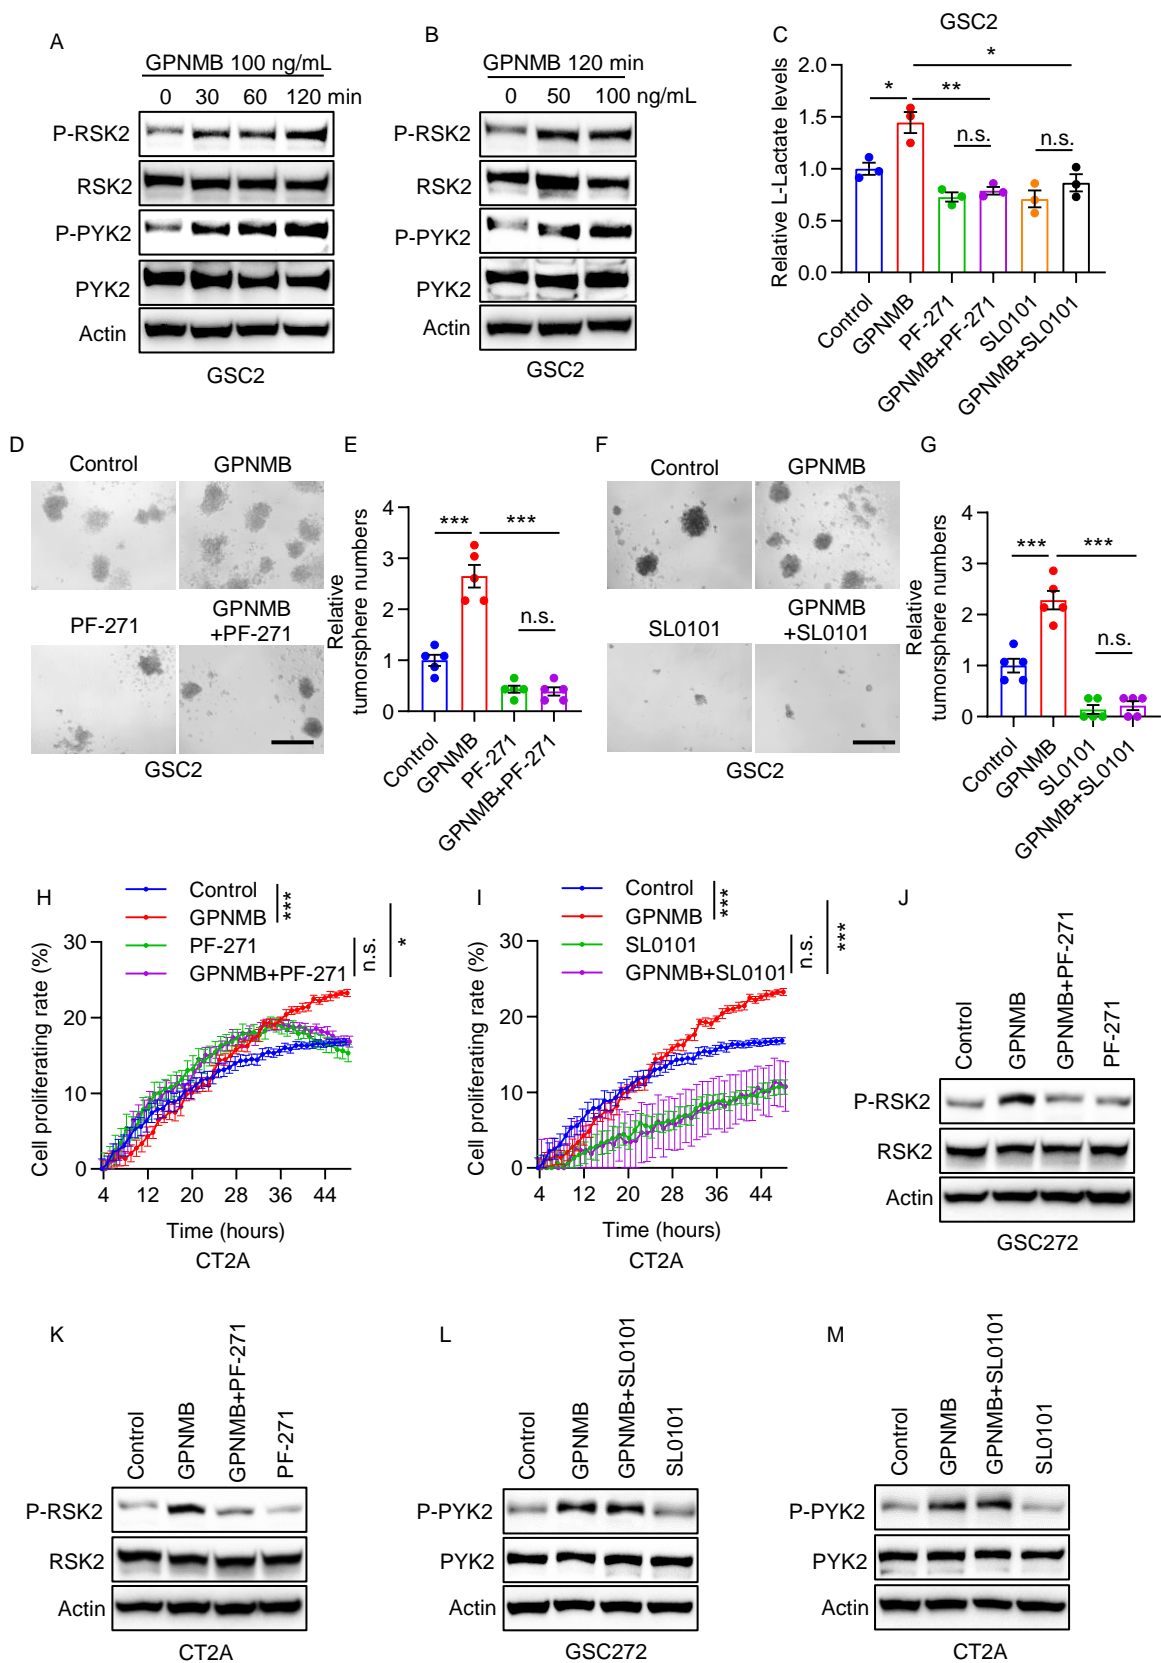

#### **Supplemental Figure 4. GPNMB activates PYK2-RSK2 axis to enhance GSC stemness**

**(A and B)** Immunoblots for P-RSK2, RSK2, P-PYK2, and PYK2 in lysates of GSC2 treated by GPNMB recombinant protein at indicated concentrations and timepoints. **(C)** Quantification of relative L-Lactate levels in GSC2 treated by GPNMB recombinant protein (100 ng/mL) in the presence or absence of PYK2 inhibitor PF-271 (15 nM) or RSK1/2 inhibitor SL0101 (100  $\mu$ M) for 24 hours.  $n = 3$  independent samples. One-way ANOVA test. **(D and E)** Representative images (D) and quantification (E) of tumorspheres of GSC2 treated by GPNMB recombinant protein (100 ng/mL) in the presence or absence of PF-271 (15 nM) for 2 weeks. Scale bar, 200  $\mu$ m.  $n = 5$  independent samples. One-way ANOVA test. **(F and G)** Representative images (F) and quantification (G) of tumorspheres of GSC2 treated by GPNMB recombinant protein (100 ng/mL) in the presence or absence of SL0101 (100  $\mu$ M) for 2 weeks. Scale bar, 200  $\mu$ m.  $n = 5$  independent samples. One-way ANOVA test. **(H and I)** Proliferation of CT2A cells treated by GPNMB recombinant protein (100 ng/mL) in the presence or absence of PF-271 (15 nM) (H) and SL0101 (100  $\mu$ M) (I) at indicated timepoints.  $n = 8$  independent samples. Two-way ANOVA test. **(J and K)** Immunoblots for P-RSK2 and RSK2 in lysates of GSC272 (J) and CT2A cells (K) treated by GPNMB recombinant protein (100 ng/mL) in the presence or absence of PF-271 (15 nM) for 2 hours. **(L and M)** Immunoblots for P-PYK2 and PYK2 in lysates of GSC272 (L) and CT2A cells (M) treated by GPNMB recombinant protein (100 ng/mL) in the presence or absence of SL0101 (100  $\mu$ M) for 2 hours. \*,  $P < 0.05$ , \*\*,  $P < 0.01$ , \*\*\*,  $P < 0.001$ , n.s., not significant ( $P > 0.05$ ).

**Supplemental Figure 5**

**A**

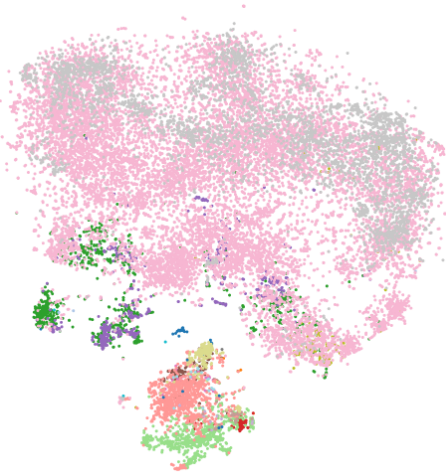

- B cell
- T-helper 1 cell
- IgG plasma cell
- Monocytic immature myeloid cell
- Polymorphonuclear immature myeloid cell
- Classical monocyte
- Macrophage
- Microglia
- Conventional type 1 dendritic cell
- Conventional type 2 dendritic cell
- Central memory CD4-positive, alpha-beta T cell
- Central memory gamma-delta T cell
- Effector CD4-positive, alpha-beta T cell
- Effector CD8-positive, alpha-beta T cell
- Effector memory CD4-positive, alpha-beta T cell
- Effector memory CD8-positive, alpha-beta T cell
- Effector memory gamma-delta T cell
- NKT-like CD8-positive T cell
- Mucosal associated invariant T cell
- Naïve thymus-derived CD4-positive, alpha-beta T cell
- Regulatory T cell

**B**

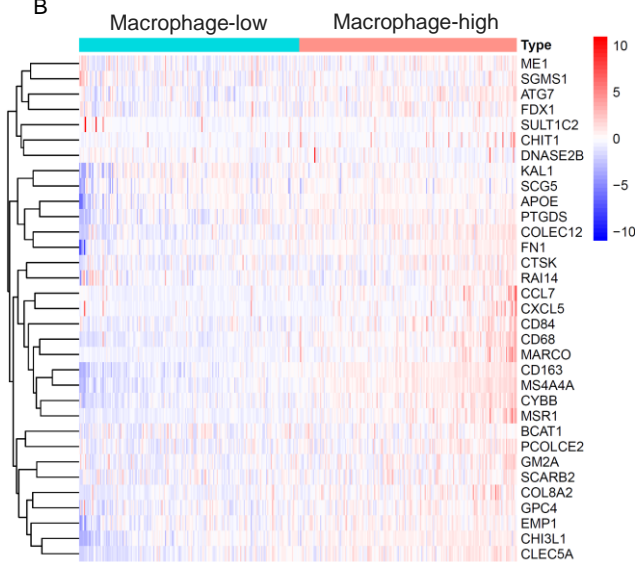

**D**

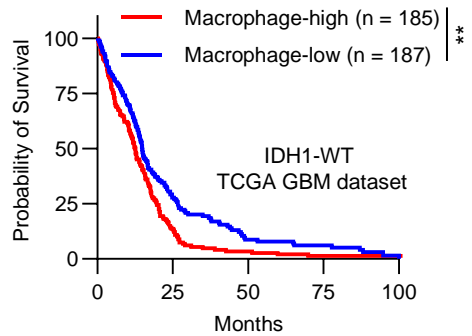

**C**

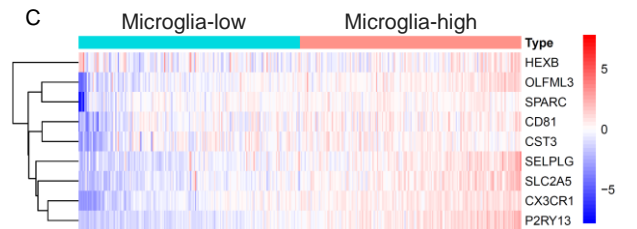

**E**

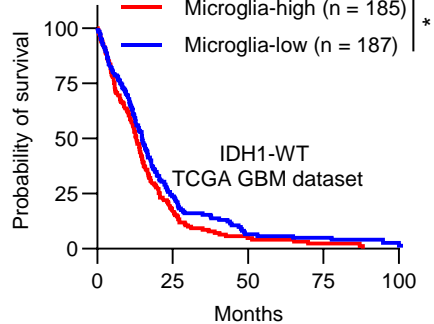

**F**

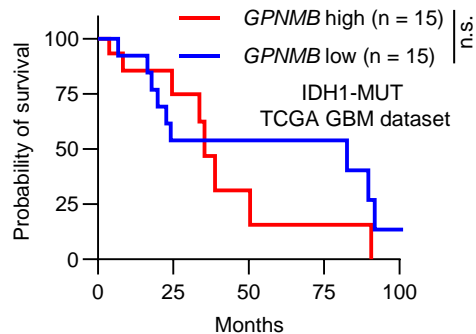

**G**

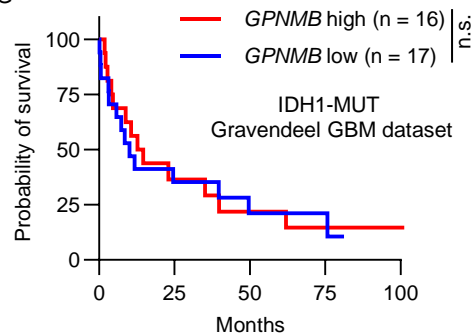

### **Supplemental Figure 5. The relationship between TAMs and GBM patient survival**

**(A)** T-distributed stochastic neighbor embedding (t-SNE) dimensional reduction of immune cells from GBM tumors based on single-cell RNA sequencing (scRNA-seq) dataset (EGAS00001004871). **(B)** Clustering of IDH1-WT human TCGA GBM samples into macrophage-high and macrophage-low groups using macrophage gene signature. **(C)** Clustering of IDH1-WT human TCGA GBM samples into microglia-high and microglia-low groups using microglia gene signature. **(D and E)** Survival curves of IDH1-WT TCGA GBM patients with high and low macrophage (D) and microglia (E) signatures. Log-rank test. **(F and G)** Survival curves of GBM patients with high and low *GPNMB* expression in IDH1-mutant TCGA (F) and Gravendeel (G) GBM datasets. Log-rank test. \*,  $P < 0.05$ , \*\*,  $P < 0.01$ . n.s., not significant ( $P > 0.05$ ).
